# Supplementary material for: Interprofessionelles Multistationen-Hörsaalpraktikum
Source: Springer Nature journal article supplement (doi:10.1007/s00391-017-1353-9), 2017-12-05
Supplement: MOESM2 [file 15282324]

| **Polypharmazie, Multimorbidität im Alter** |
| --- |
| - erläutern können, warum bei Menschen im Alter häufig mehrere Erkrankungen gleichzeitig vorliegen und die medikamentöse Therapie erschweren |
| - epidemiologische Besonderheiten in der Verordnungshäufigkeit bei alten Menschen (inkl. Multimorbidität, Multimedikation) benennen können |
| - pharmakokinetische Besonderheiten bei alten Patienten (insbesondere in der Absorption, Verteilung, Biotransformation und renalen Exkretion) benennen können |
| - Besonderheiten in der pharmakodynamischen Wirkung von Arzneimitteln bei alten Patienten (besondere Beispiele: Störungen der Regulation, Sturzgefahr durch Arzneimittel) benennen können |
| - die wichtigsten im Alter relevanten Arzneimittelnebenwirkungen   benennen können |
| - den Medikamentenplan eines Patienten hinsichtlich einer rationalen Arzneimitteltherapie überprüfen und anpassen können |
| **ID** |
| 5.3.1.6 Sie können auf der Basis der verfügbaren Patienteninformationen Differentialdiagnosen formulieren sowie einen Diagnostik- und/oder Behandlungsplan erstellen. |
| 5.4.1.1 Sie können einen effektiven Behandlungs- bzw. Rehabilitationsplan in Zusammenarbeit mit den Patientinnen und Patienten und ihrem Umfeld umsetzen. |
| 16.1.1.10 Sie können Besonderheiten bei der Behandlung älterer Patientinnen und Patienten erläutern und diese Besonderheiten bei der Therapie berücksichtigen. |
| 16.5 Die Absolventin und der Absolvent bewerten Arzneimittel und deren Anwendung kritisch und können in Abhängigkeit von Situation und Patientin bzw. Patient eine adäquate Arzneitherapie vorschlagen beziehungsweise durchführen. |
| 16.5.1.5 Sie können die Problematik der Polypharmazie erklären und Maßnahmen zu deren Vermeidung anwenden. |
| 16.5.1.7 Sie können die Dosierung von Arzneimitteln bei Patienten und Patientinnen mit eingeschränkter Nieren- oder Leberfunktion adäquat anpassen. |
| 16.5.1.10 Sie können Besonderheiten der Arzneimitteltherapie beim älteren Menschen erläutern und Beispiele nennen. |
| 11.1.1.2 Sie können die verschiedenen Interessenlagen, unter denen ihr Handeln stattfindet, erläutern, reflektieren sowie Konflikte mit den Interessen von Patientinnen und Patienten identifizieren und bei ihren Entscheidungen berücksichtigen. |
| 11.1.1.5 Sie können ihr ärztliches Handeln an den individuellen Erfordernissen von Patientinnen und Patienten ausrichten. |
| 12.7.2 Entwicklung normaler Funktionen über die Lebensspanne: Sie erläutern die Veränderungen des normalen Körperaufbaus, der Organfunktionen, der Persönlichkeitsentwicklung und des Verhaltens über verschiedene Phasen der Lebensspanne. |
| 12.7.2.4 Sie können strukturelle und funktionelle Veränderungen auf der Ebene des ganzen Körpers über die Lebensspanne erklären.  16.1.1.16 Sie können die Prinzipien einer Nutzen-Risiko-Abwägung erklären und bei der Therapieplanung berücksichtigen.  **Anlässe für ärztliche Konsultationen/Erkrankungsbezogene Inhalte:**  20.51 Intoxikation oder unerwünschte Medikamentenwirkung  20.64 Multimorbidität |

| **Geriatrisches Assessment** |
| --- |
| - den Begriff „Geriatrisches Assessment“ erklären können |
| - die wichtigsten Skalen zur **Beurteilung der Alltagsaktivität** (Barthel), zur **Mobilitätsbeurteilung** (Timed up & Go Test) und zur Beurteilung der **Kognition** (Mini-Mental Test) und der **Emotion** (Geriatric Depression Scale) aufzählen und erläutern können |
| - das Geriatrische Basisassessment (MMS, Uhrentest, Timed up and go, Barthel I, Demtect, GDS) im Eigenversuch mit einem Partner anwenden können |
| - Konsequenzen aus dem Ergebnis des Geriatrischen Basisassessment ziehen und diese benennen können |
| **ID:** |
| 5.3 Die Absolventin und der Absolvent führen eine angemessene Diagnostik ihrer Patientinnen und Patienten durch. |
| 5.3.1.2 Sie können eine gezielte Anamnese erheben und dokumentieren sowie daraus präventive, gesundheitsfördernde, diagnostische, therapeutische und/oder rehabilitative Maßnahmen ableiten. |
| 5.3.1.3 Sie können eine gezielte körperliche und psychosoziale Untersuchung durchführen und dokumentieren sowie daraus präventive, gesundheitsfördernde, diagnostische, therapeutische und/oder rehabilitative Maßnahmen ableiten. |
| 5.3.1.4 Sie können Untersuchungsmethoden evidenzbasiert, effektiv, ressourcenbewusst und ethisch fundiert auswählen und die Ergebnisse dokumentieren. |
| 5.3.1.6 Sie können auf der Basis der verfügbaren Patienteninformationen Differentialdiagnosen formulieren sowie einen Diagnostik- und/oder Behandlungsplan erstellen. |
| 9.1.1.2 Sie können den individuellen Gesundheitszustand von Personen einschätzen. |
| 9.1.1.3 Sie können wesentliche Einflussfaktoren und Parameter sowie individuelle Ressourcen zur Veränderung der gesundheitlichen Gesamtsituation von Personen identifizieren. |
| 9.1.1.4 Sie können individuelle Ressourcen zur Verbesserung der gesundheitlichen Gesamtsituation von Personen identifizieren. |
| 9.2 Die Absolventin und der Absolvent erfassen umfassend den Gesundheitszustand von Patientengruppen und von Bevölkerungsgruppen und wirken auf deren Verbesserung hin. |
| 11.1.6 Sie kennen und berücksichtigen die Bedürfnisse von Menschen mit Behinderung. |
| 11.4.3.1 Sie können soziale, kulturelle, ethnische, religiöse, alters-, geschlechter- und behinderungsbezogene Aspekte der Patientinnen und Patienten berücksichtigen. |
| 14b.3.1.25 Sie können geriatrische Testverfahren durchführen.  19.2.6 Sie erläutern, reflektieren und beraten zu körperlicher Aktivität, Bewegung und Sport. |
| 19.2.9.3 Sie können in der Patientenberatung Risikofaktoren identifizieren und gesundheitsförderliche, präventive Angebote empfehlen. |
| 19.2.11.5 Sie können die Bedeutung von Mobilität, Kognition, Inkontinenz, Ernährung bei älteren Menschen erkennen und sie unter dem Aspekt von Erhalt der Selbständigkeit, sozialen Bezügen und Lebensqualität reflektieren.  **Anlässe für ärztliche Konsultationen/Erkrankungsbezogene Inhalte:**  20.32 Gedächtnisstörungen und Vergesslichkeit  20.33 Gehstörungen und Sturzneigung  20.64 Multimorbidität  20.116 Verlangsamung |

| **Heil- und Hilfsmittel** |
| --- |
| - häufige Erkrankungen geriatrischer Patienten benennen können, bei denen Heil- und Hilfsmittel benötigt werden |
| - **Hilfsmittel** für geriatrische Patienten benennen können (Rollator, Prothesen, Gehwagen etc.) |
| - Hilfsmittel für geriatrische Patienten verordnen können |
| - die Heilmittel **Logopädie** und **Ergotherapie** verordnen können |
| - Ziele und Methoden der **Ergotherapie** unter besonderer Berücksichtigung von Feinmotorik, Koordination, Gedächtnis- und Orientierungstraining benennen können |
| **ID:** |
| 5.4 Die Absolventin und der Absolvent setzen vorbeugende, therapeutische und rehabilitative Maßnahmen effektiv ein. |
| 5.4.1.2 Sie können effektiv und zur rechten Zeit geeignete präventive, therapeutische und rehabilitative Interventionen vornehmen. |
| 8.2 Die Absolventin und der Absolvent reflektieren die Zusammenarbeit im multiprofessionellen Team und gestalten diese in konstruktiver Weise im Hinblick auf eine hohe Qualität in der Patientenversorgung. |
| 8.2.2 Sie verfügen über eine berufsspezifische Rollenidentität und kennen die Rollen, Kompetenzen und Verantwortungsbereiche der anderen beteiligten Berufsgruppen. |
| 9.1.1.2 Sie können den individuellen Gesundheitszustand von Personen einschätzen. |
| 9.1.3 Sie betreiben individuelle Gesundheitsförderung in Zusammenarbeit mit anderen Gesundheitsberufen und Leistungsträgern. |
| 10.3.2.1 Sie können bei konkreten Patientinnen und Patienten mit akut eingetretener Hilflosigkeit medizinische, soziale, kulturelle, alters- und geschlechterbezogene Sachverhalte erkennen und trennen, ggf. den ökonomischen Konflikt identifizieren und eine Entscheidung mit vorbereiten. |
| 11.1.1.5 Sie können ihr ärztliches Handeln an den individuellen Erfordernissen von Patientinnen und Patienten ausrichten. |
| 11.1.6 Sie kennen und berücksichtigen die Bedürfnisse von Menschen mit Behinderung. |
| 11.4.3.1 Sie können soziale, kulturelle, ethnische, religiöse, alters-, geschlechter- und behinderungsbezogene Aspekte der Patientinnen und Patienten berücksichtigen. |
| 16.1.1.10 Sie können Besonderheiten bei der Behandlung älterer Patientinnen und Patienten erläutern und diese Besonderheiten bei der Therapie berücksichtigen. |
| 16.10.1.5 Sie können Prinzipien der Mobilisation adaptiert an die zugrunde liegende Störung erklären und anwenden. |
| 16.10.1.6 Sie können die wesentlichen Aspekte einer Versorgung von Patientinnen und Patienten mit Prothesen in Abhängigkeit von der Indikation beschreiben.  19.2.6 Sie erläutern, reflektieren und beraten zu körperlicher Aktivität, Bewegung und Sport.  19.2.11.3 Sie können älteren Patientinnen und Patienten die Bedeutung von körperlicher Aktivität erläutern und die Möglichkeiten und Grenzen der körperlichen Aktivität im Rahmen von Alterskrankheiten reflektieren.  19.2.11.5 Sie können die Bedeutung von Mobilität, Kognition, Inkontinenz, Ernährung bei älteren Menschen erkennen und sie unter dem Aspekt von Erhalt der Selbständigkeit, sozialen Bezügen und Lebensqualität reflektieren.  **Anlässe für ärztliche Konsultationen/Erkrankungsbezogene Inhalte:**  20.33 Gehstörungen und Sturzneigung  20.37 generalisierter Schmerz, Schmerz an multiplen Lokalisationen  20.60 Lähmungen  20.66 Muskelschwäche |
| 20.74 Pflegebedürftigkeit, Gebrechlichkeit und Bettlägerigkeit  20.82 Rückenschmerzen  20.86 Schmerzen der Extremitäten und Gelenke  20.100 Steifheit und erschwerte Bewegungen (inkl. Rigor, Spastik)  21.1.2.44 Chronische Rückenschmerzen  21.1.2.31 Arthrose  21.1.3.6 Diabeteskomplikationen (Mikro- und Makroangiopathien, Nephropathie, KHK, pAVK, Apoplex, diabetisches Fußsyndrom, diabetische Polyneuropathie, diabetische Retino- und Makulopathie) |
|  |

| **Pflegestufen, Unterbringung in Kurzzeitpflege/ Pflegeheim, ambulante Pflege** |
| --- |
| - Grundzüge der Pflegeversicherung, insbesondere die zeitlichen Kriterien für die Einstufung in die Pflegestufen I, II und III erläutern können |
| - Rechte und Leistungsansprüche des geriatrischen Patienten aus den Sozialsystemen (Krankheit, Rehabilitation, Pflege) benennen können |
| - in einer komplexen Kasuistik einem Patienten die entsprechende Pflegestufe zuordnen können |
| **ID:** |
| 5.2.1.1 Sie können klinisches, sozialmedizinisches und grundlegendes biomedizinisches Wissen anwenden. |
| 5.4.1.7 Sie können geeignete Nachsorge bzw. Weiterbetreuung für Patientinnen, Patienten und ggf. ihr Umfeld organisieren. |
| 8.2 Die Absolventin und der Absolvent reflektieren die Zusammenarbeit im multiprofessionellen Team und gestalten diese in konstruktiver Weise im Hinblick auf eine hohe Qualität in der Patientenversorgung. |
| 8.2.2 Sie verfügen über eine berufsspezifische Rollenidentität und kennen die Rollen, Kompetenzen und Verantwortungsbereiche der anderen beteiligten Berufsgruppen. |
| 9.1.1.2 Sie können den individuellen Gesundheitszustand von Personen einschätzen.  10.2 Die Absolventin und der Absolvent kennen die Versorgungsstrukturen.  10.2.1 Sie identifizieren und analysieren soziale Versorgungsstrukturen.  10.2.1.1 Sie können für eine konkrete Patientin bzw. einen konkreten Patienten die beteiligten Versorgungsstrukturen identifizieren und sich bei der Behandlungsplanung daran orientieren. |
| 10.3.2.1 Sie können bei konkreten Patientinnen und Patienten mit akut eingetretener Hilflosigkeit medizinische, soziale, kulturelle, alters- und geschlechterbezogene Sachverhalte erkennen und trennen, ggf. den ökonomischen Konflikt identifizieren und eine Entscheidung mit vorbereiten. |
| 11.1.6 Sie kennen und berücksichtigen die Bedürfnisse von Menschen mit Behinderung. |
| 11.4.3.1 Sie können soziale, kulturelle, ethnische, religiöse, alters-, geschlechter- und behinderungsbezogene Aspekte der Patientinnen und Patienten berücksichtigen. |
| 12.2.6.5 Sie können Gesundheits- und Krankheitserleben als subjektive Prozesse in ihren Wechselwirkungen mit individuellen und sozialen Rahmenbedingungen erläutern. |

| **Delir und Gerontopsychiatrie** |
| --- |
| - erste diagnostische Möglichkeiten (durch Anamnese, Untersuchung, klin. Tests) bei V.a. Demenzerkrankung benennen und durchführen können |
| - wichtige primäre und sekundäre Demenzformen benennen können |
| - nichtmedikamentöse und medikamentöse Behandlungsformen bei kognitiven Störungen nennen, einordnen und erläutern können |
| - die besonderen Gründe für Altersdepressionen aufzählen können |
| - erläutern können, was die Besonderheiten der Depression im Alter ausmacht |
| - definieren können, was ein Delir ist |
| - Risikofaktoren für das Auftreten eines Delirs benennen können |
| - die Besonderheiten der Wirkung und Nebenwirkungen von Psychopharmaka bei älteren Menschen benennen können |
| - Möglichkeiten zur Delirprophylaxe benennen können |
| **ID:** |
| 5.3 Die Absolventin und der Absolvent führen eine angemessene Diagnostik ihrer Patientinnen und Patienten durch. |
| 5.3.1.2 Sie können eine gezielte Anamnese erheben und dokumentieren sowie daraus präventive, gesundheitsfördernde, diagnostische, therapeutische und/oder rehabilitative Maßnahmen ableiten. |
| 5.3.1.3 Sie können eine gezielte körperliche und psychosoziale Untersuchung durchführen und dokumentieren sowie daraus präventive, gesundheitsfördernde, diagnostische, therapeutische und/oder rehabilitative Maßnahmen ableiten. |
| 5.3.1.4 Sie können Untersuchungsmethoden evidenzbasiert, effektiv, ressourcenbewusst und ethisch fundiert auswählen und die Ergebnisse dokumentieren . |
| 5.3.1.6 Sie können auf der Basis der verfügbaren Patienteninformationen Differentialdiagnosen formulieren sowie einen Diagnostik- und/oder Behandlungsplan erstellen. |
| 5.4 Die Absolventin und der Absolvent setzen vorbeugende, therapeutische und rehabilitative Maßnahmen effektiv ein. |
| 5.4.1.2 Sie können effektiv und zur rechten Zeit geeignete präventive, therapeutische und rehabilitative Interventionen vornehmen. |
| 9.1.1.3 Sie können wesentliche Einflussfaktoren und Parameter sowie individuelle Ressourcen zur Veränderung der gesundheitlichen Gesamtsituation von Personen identifizieren. |
| 9.1.1.4 Sie können individuelle Ressourcen zur Verbesserung der gesundheitlichen Gesamtsituation von Personen identifizieren. |
| 10.3.2.1 Sie können bei konkreten Patientinnen und Patienten mit akut eingetretener Hilflosigkeit medizinische, soziale, kulturelle, alters- und geschlechterbezogene Sachverhalte erkennen und trennen, ggf. den ökonomischen Konflikt identifizieren und eine Entscheidung mit vorbereiten. |
| 11.1.1.5 Sie können ihr ärztliches Handeln an den individuellen Erfordernissen von Patientinnen und Patienten ausrichten. |
| 11.4.3.1 Sie können soziale, kulturelle, ethnische, religiöse, alters-, geschlechter- und behinderungsbezogene Aspekte der Patientinnen und Patienten berücksichtigen. |
| 12.7.2.5 Sie können Veränderungen von Erleben und Verhalten über die Lebensspanne erklären. |
| 16.4.1.1 Sie können wichtige Prinzipien der operativen und anästhesiologischen Therapie, der präoperativen Vorbereitung und Risikoabklärung und der postoperativen Nachbetreuung bei elektiven Eingriffen beschreiben und erklären.  16.5.1.19 Sie können die wesentlichen Wirkungen antipsychotischer Medikamente beschreiben und in Abhängigkeit von der Indikation geeignete Substanzvertreter nennen. |
| 16.5.1.25 Sie können die Prinzipien einer pharmakologischen Behandlung von Demenzerkrankungen erklären und geeignete Arzneimittel beschreiben. |
| 19.2.11.1 Sie können die Prävention wesentlicher Risiken im Seniorenalter benennen. |
| 19.2.11.5 Sie können die Bedeutung von Mobilität, Kognition, Inkontinenz, Ernährung bei älteren Menschen erkennen und sie unter dem Aspekt von Erhalt der Selbständigkeit, sozialen Bezügen und Lebensqualität reflektieren.  **Anlässe für ärztliche Konsultationen/Erkrankungsbezogene Inhalte:**  20.24 Denk- und Wahrnehmungsstörungen  20.32 Gedächtnisstörungen und Vergesslichkeit  20.71 Patient mit Fremd- oder Selbstgefährdung  20.72 perioperative Versorgung (prä- und postoperativ), OP-Fähigkeit  20.73 Persönlichkeitsveränderungen  20.115 Verhaltensauffälligkeiten  20.116 Verlangsamung  21.1.10.42 Postoperative kognitive Dysfunktion/ Delir  21.1.10.58 Delirium  21.1.10.72 Suizid |

| **Ernährungszustand im Alter, Dysphagie** |
| --- |
| - physiologische Veränderungen im Alter und ihre Auswirkungen auf die Ernährung beschreiben können |
| - Möglichkeiten zur Bewertung des Ernährungszustandes benennen können |
| - Besonderheiten des Energie- und Nährstoffbedarfs geriatrischer Patienten erläutern können |
| - häufige Erkrankungen älterer Patienten, bei denen spezielle Kostformen notwendig werden, benennen können |
| - ein gezieltes Anamnesegespräch bei Patienten mit Verdacht auf Dysphagie durchführen können |
| - Schritte des Untersuchungsablaufs bei Neurogener Oropharyngealer Dysphagie benennen und erläutern können |
| **ID:** |
| 5.3 Die Absolventin und der Absolvent führen eine angemessene Diagnostik ihrer Patientinnen und Patienten durch. |
| 5.3.1.2 Sie können eine gezielte Anamnese erheben und dokumentieren sowie daraus präventive, gesundheitsfördernde, diagnostische, therapeutische und/oder rehabilitative Maßnahmen ableiten. |
| 5.3.1.3 Sie können eine gezielte körperliche und psychosoziale Untersuchung durchführen und dokumentieren sowie daraus präventive, gesundheitsfördernde, diagnostische, therapeutische und/oder rehabilitative Maßnahmen ableiten. |
| 5.3.1.4 Sie können Untersuchungsmethoden evidenzbasiert, effektiv, ressourcenbewusst und ethisch fundiert auswählen und die Ergebnisse dokumentieren. |
| 5.3.1.6 Sie können auf der Basis der verfügbaren Patienteninformationen Differentialdiagnosen formulieren sowie einen Diagnostik- und/oder Behandlungsplan erstellen. |
| 5.4.1.2 Sie können effektiv und zur rechten Zeit geeignete präventive, therapeutische und rehabilitative Interventionen vornehmen. |
| 8.2 Die Absolventin und der Absolvent reflektieren die Zusammenarbeit im multiprofessionellen Team und gestalten diese in konstruktiver Weise im Hinblick auf eine hohe Qualität in der Patientenversorgung. |
| 8.2.2 Sie verfügen über eine berufsspezifische Rollenidentität und kennen die Rollen, Kompetenzen und Verantwortungsbereiche der anderen beteiligten Berufsgruppen. |
| 9.1.3 Sie betreiben individuelle Gesundheitsförderung in Zusammenarbeit mit anderen Gesundheitsberufen und Leistungsträgern. |
| 11.1.6 Sie kennen und berücksichtigen die Bedürfnisse von Menschen mit Behinderung. |
| 12.15.2.1 Sie können den Vorgang des Kauens und des Schluckens sowie deren willkürliche und autonome Steuerung erklären. |
| 16.10.1.10 Sie können übende Therapieverfahren bei Stimm-, Schluck-, Sprach- und Sprechstörungen erklären.  19.2.4.1 Sie können Grundlagen gesunder und ausgewogener Ernährung unter Berücksichtigung von Alter, Geschlecht, kulturellem Hintergrund, persönlicher Lebenssituation und sozialen Rahmenbedingungen erläutern.  19.2.4.2 Sie können die Grundlagen der Ernährungsregulation und die Risiken durch Fehlernährung einschließlich extremer Ernährungsformen erläutern.  19.2.4.3 Sie können evaluierte Interventionsmöglichkeiten benennen.  19.2.4.4 Sie können ein Informationsgespräch zur Ernährung durchführen und ein geeignetes Beratungsangebot vermitteln. |
| 19.2.11.5 Sie können die Bedeutung von Mobilität, Kognition, Inkontinenz, Ernährung bei älteren Menschen erkennen und sie unter dem Aspekt von Erhalt der Selbständigkeit, sozialen Bezügen und Lebensqualität reflektieren.  **Anlässe für ärztliche Konsultationen/Erkrankungsbezogene Inhalte:**  20.5 Appetitlosigkeit und abnormes Essverhalten  20.84 Schluckbeschwerden  20.111 Unter-, Fehl- und Mangelernährung |

| **Geriatrische Patienten in der Notaufnahme** |
| --- |
| - häufige stationäre Einweisungsgründe geriatrischer Patienten benennen können |
| - Instrumente zur Identifikation geriatrischer Patienten benennen und erläutern können (ISAR) |
| - das Spannungsfeld einer **Limitierung der Therapie** bei prognostisch ungünstigen Erkrankungen bei alten Patienten erläutern können |
| **ID:** |
| 5.3 Die Absolventin und der Absolvent führen eine angemessene Diagnostik ihrer Patientinnen und Patienten durch. |
| 5.3.1.2 Sie können eine gezielte Anamnese erheben und dokumentieren sowie daraus präventive, gesundheitsfördernde, diagnostische, therapeutische und/oder rehabilitative Maßnahmen ableiten. |
| 5.3.1.3 Sie können eine gezielte körperliche und psychosoziale Untersuchung durchführen und dokumentieren sowie daraus präventive, gesundheitsfördernde, diagnostische, therapeutische und/oder rehabilitative Maßnahmen ableiten. |
| 5.3.1.4 Sie können Untersuchungsmethoden evidenzbasiert, effektiv, ressourcenbewusst und ethisch fundiert auswählen und die Ergebnisse dokumentieren. |
| 5.3.1.6 Sie können auf der Basis der verfügbaren Patienteninformationen Differentialdiagnosen formulieren sowie einen Diagnostik- und/oder Behandlungsplan erstellen. |
| 5.4.1.2 Sie können effektiv und zur rechten Zeit geeignete präventive, therapeutische und rehabilitative Interventionen vornehmen. |
| 8.2.2 Sie verfügen über eine berufsspezifische Rollenidentität und kennen die Rollen, Kompetenzen und Verantwortungsbereiche der anderen beteiligten Berufsgruppen. |
| 9.1.1.2 Sie können den individuellen Gesundheitszustand von Personen einschätzen. |
| 9.1.1.4 Sie können individuelle Ressourcen zur Verbesserung der gesundheitlichen Gesamtsituation von Personen identifizieren.  10.2 Die Absolventin und der Absolvent kennen die Versorgungsstrukturen.  10.2.1 Sie identifizieren und analysieren soziale Versorgungsstrukturen.  10.2.1.1 Sie können für eine konkrete Patientin bzw. einen konkreten Patienten die beteiligten Versorgungsstrukturen identifizieren und sich bei der Behandlungsplanung daran orientieren. |
| 10.3.2.1 Sie können bei konkreten Patientinnen und Patienten mit akut eingetretener Hilflosigkeit medizinische, soziale, kulturelle, alters- und geschlechterbezogene Sachverhalte erkennen und trennen, ggf. den ökonomischen Konflikt identifizieren und eine Entscheidung mit vorbereiten. |
| 11.1.1.1 Sie können die Erfolgsaussichten, Alternativen und Risiken prophylaktischer, diagnostischer, therapeutischer, rehabilitativer und palliativer Maßnahmen transparent darstellen. |
| 11.1.1.2 Sie können die verschiedenen Interessenlagen, unter denen ihr Handeln stattfindet, erläutern, reflektieren sowie Konflikte mit den Interessen von Patientinnen und Patienten identifizieren und bei ihren Entscheidungen berücksichtigen. |
| 11.1.1.5 Sie können ihr ärztliches Handeln an den individuellen Erfordernissen von Patientinnen und Patienten ausrichten. |
| 11.1.6 Sie kennen und berücksichtigen die Bedürfnisse von Menschen mit Behinderung. |
| 11.4.3.1 Sie können soziale, kulturelle, ethnische, religiöse, alters-, geschlechter- und behinderungsbezogene Aspekte der Patientinnen und Patienten berücksichtigen. |
| 12.2.6.5 Sie können Gesundheits- und Krankheitserleben als subjektive Prozesse in ihren Wechselwirkungen mit individuellen und sozialen Rahmenbedingungen erläutern.  17.1.1 Sie kennen zentrale organisatorische Aspekte der Notfallmedizin und wenden diese an.  17.2 Die Absolventin und der Absolvent demonstrieren kommunikative und kooperative Dimension und Non-Technical-Skills der Notfallmedizin.  17.3 Die Absolventin und der Absolvent untersuchen Notfallpatientinnen und Notfallpatienten fokussiert, alters- und situationsgerecht.  17.4 Die Absolventin und der Absolvent erläutern diagnostische Maßnahmen in der Notfallmedizin.  18.3.1.2 Sie können die Erfordernisse der informierten Einwilligung in der Praxis erfüllen.  **Anlässe für ärztliche Konsultationen/Erkrankungsbezogene Inhalte:**  20.7 Atemnot und Kurzatmigkeit  20.18 Betreuung unheilbar Kranker und Sterbender  20.20 Bewusstseinsverlust oder-störung, Verwirrung und psychische Dekompensation, Vigilanzstörung  20.27 Fieber  20.45 Hämaturie  20.49 Husten (produktiv oder nicht-produktiv inkl. Haemoptoe)  20.51 Intoxikation oder unerwünschte Medikamentenwirkung  20.56 Kollaps  20.58 Krampfanfall  20.59 Labor- oder technische Untersuchungen als Therapie- oder Nebenwirkungskontrolle  20.63 Müdigkeit / Erschöpfung / Allgemeine Schwäche  20.64 Multimorbidität  20.97 Schwindel und Taumel  20.110 Übelkeit und Erbrechen  20.113 Veränderungen und Beschwerden des Stuhlgangs  21.1.1.16 Synkope, Kollaps und Sturz |

| **Patientenverfügung/ Vorsorgevollmacht/ Betreuungsverfügung** |
| --- |
| - Möglichkeiten der Willenserklärung für den Fall einer späteren Einwilligungsunfähigkeit benennen können |
| - die Funktion einer Patientenverfügung, Vorsorgevollmacht und Betreuungsverfügung erläutern können |
| - anhand einer komplexen Kasuistik das ärztliche Handeln bei Vorliegen einer Patientenverfügung schlussfolgern können |
| - die gesetzlichen Anforderungen zur Erstellung der betr. Willenserklärungen benennen können |
| **ID:** |
| 8.2 Die Absolventin und der Absolvent reflektieren die Zusammenarbeit im multiprofessionellen Team und gestalten diese in konstruktiver Weise im Hinblick auf eine hohe Qualität in der Patientenversorgung. |
| 10.3.2.1 Sie können bei konkreten Patientinnen und Patienten mit akut eingetretener Hilflosigkeit medizinische, soziale, kulturelle, alters- und geschlechterbezogene Sachverhalte erkennen und trennen, ggf. den ökonomischen Konflikt identifizieren und eine Entscheidung mit vorbereiten. |
| 11.1.1.2 Sie können die verschiedenen Interessenlagen, unter denen ihr Handeln stattfindet, erläutern, reflektieren sowie Konflikte mit den Interessen von Patientinnen und Patienten identifizieren und bei ihren Entscheidungen berücksichtigen. |
| 11.1.1.5 Sie können ihr ärztliches Handeln an den individuellen Erfordernissen von Patientinnen und Patienten ausrichten. |
| 11.4.3.1 Sie können soziale, kulturelle, ethnische, religiöse, alters-, geschlechter- und behinderungsbezogene Aspekte der Patientinnen und Patienten berücksichtigen. |
| 14c.4.4.1 Sie können Gespräche mit Bezugspersonen / Sorgeberechtigten / Vertretern unter Beachtung des Patientenwillens und der Vertraulichkeit führen.  18.3.1.2 Sie können die Erfordernisse der informierten Einwilligung in der Praxis erfüllen. |

| **Geriatrische Rehabilitation** |
| --- |
| - Rechte und Leistungsansprüche des geriatrischen Patienten aus den Sozialsystemen (Krankheit, Rehabilitation, Pflege) benennen können |
| **ID:** |
| 5.2.1.1 Sie können klinisches, sozialmedizinisches und grundlegendes biomedizinisches Wissen anwenden. |
| 5.3.1.2 Sie können eine gezielte Anamnese erheben und dokumentieren sowie daraus präventive, gesundheitsfördernde, diagnostische, therapeutische und/oder rehabilitative Maßnahmen ableiten. |
| 5.3.1.3 Sie können eine gezielte körperliche und psychosoziale Untersuchung durchführen und dokumentieren sowie daraus präventive, gesundheitsfördernde, diagnostische, therapeutische und/oder rehabilitative Maßnahmen ableiten. |
| 5.3.1.4 Sie können Untersuchungsmethoden evidenzbasiert, effektiv, ressourcenbewusst und ethisch fundiert auswählen und die Ergebnisse dokumentieren. |
| 5.3.1.6 Sie können auf der Basis der verfügbaren Patienteninformationen Differentialdiagnosen formulieren sowie einen Diagnostik- und/oder Behandlungsplan erstellen. |
| 5.4 Die Absolventin und der Absolvent setzen vorbeugende, therapeutische und rehabilitative Maßnahmen effektiv ein. |
| 5.4.1.1 Sie können einen effektiven Behandlungs- bzw. Rehabilitationsplan in Zusammenarbeit mit den Patientinnen und Patienten und ihrem Umfeld umsetzen. |
| 5.4.1.2 Sie können effektiv und zur rechten Zeit geeignete präventive, therapeutische und rehabilitative Interventionen vornehmen. |
| 5.4.1.7 Sie können geeignete Nachsorge bzw. Weiterbetreuung für Patientinnen, Patienten und ggf. ihr Umfeld organisieren. |
| 8.2 Die Absolventin und der Absolvent reflektieren die Zusammenarbeit im multiprofessionellen Team und gestalten diese in konstruktiver Weise im Hinblick auf eine hohe Qualität in der Patientenversorgung. |
| 9.1.1.2 Sie können den individuellen Gesundheitszustand von Personen einschätzen. |
| 9.1.1.4 Sie können individuelle Ressourcen zur Verbesserung der gesundheitlichen Gesamtsituation von Personen identifizieren. |
| 9.1.3 Sie betreiben individuelle Gesundheitsförderung in Zusammenarbeit mit anderen Gesundheitsberufen und Leistungsträgern. |
| 9.2 Die Absolventin und der Absolvent erfassen umfassend den Gesundheitszustand von Patientengruppen und von Bevölkerungsgruppen und wirken auf deren Verbesserung hin. |
| 9.3 Sie betreiben individuelle und bevölkerungsbezogene Gesundheitsförderung in Zusammenarbeit mit Institutionen und Organisationen des Gesundheitswesens.  10.2 Die Absolventin und der Absolvent kennen die Versorgungsstrukturen.  10.2.1 Sie identifizieren und analysieren soziale Versorgungsstrukturen.  10.2.1.1 Sie können für eine konkrete Patientin bzw. einen konkreten Patienten die beteiligten Versorgungsstrukturen identifizieren und sich bei der Behandlungsplanung daran orientieren. |
| 10.3.2.1 Sie können bei konkreten Patientinnen und Patienten mit akut eingetretener Hilflosigkeit medizinische, soziale, kulturelle, alters- und geschlechterbezogene Sachverhalte erkennen und trennen, ggf. den ökonomischen Konflikt identifizieren und eine Entscheidung mit vorbereiten. |
| 11.1.1.1 Sie können die Erfolgsaussichten, Alternativen und Risiken prophylaktischer, diagnostischer, therapeutischer, rehabilitativer und palliativer Maßnahmen transparent darstellen. |
| 11.1.6 Sie kennen und berücksichtigen die Bedürfnisse von Menschen mit Behinderung. |
| 11.4.3.1 Sie können soziale, kulturelle, ethnische, religiöse, alters-, geschlechter- und behinderungsbezogene Aspekte der Patientinnen und Patienten berücksichtigen.  15.13 Die Absolventin und der Absolvent wählen Untersuchungsmethoden der medizinischen und/oder beruflichen Rehabilitation zur individuellen Erfassung der Beeinträchtigungen und Ressourcen eines Patienten/einer Patientin für die Indikationsstellung und Evaluation von rehabilitativen Leistungen aus und nutzen die Ergebnisse für weitere diagnostische und therapeutische Entscheidungen.  15.13.1 Sie wählen rehabilitationsdiagnostische Instrumente patientenbezogen und situationsgerecht entsprechend den Dimensionen der International Classification of Functioning, Disability and Health (ICF) aus und nutzen die Ergebnisse für weitere diagnostische und therapeutische Entscheidungen.  15.13.1.1 Sie können die Instrumente zur Erfassung der Körperfunktionen und -strukturen nach der ICF auswählen und die Ergebnisse für weitere diagnostische und therapeutische Entscheidungen nutzen.  15.13.1.2 Sie können die Instrumente zur Erfassung der Aktivitäten und Teilhabe nach der ICF auswählen und die Ergebnisse für weitere diagnostische und therapeutische Entscheidungen nutzen. |
| 15.13.1.4 Sie können die Bedeutung aller Beeinträchtigungen und Ressourcen mit ihren Zusammenhängen für die Indikationsstellung von rehabilitativen Leistungen nutzen mit Differenzierung der Rehabilitationsbedürftigkeit, Rehabilitationsfähigkeit, Rehabilitationsziele und Rehabilitationsprognose einschätzen. |
| 15.13.1.5 Sie können die Bedeutung aller Beeinträchtigungen und Ressourcen für die sozialmedizinischen Begutachtung mit Berücksichtigung rehabilitativer Leistungen einschätzen.  19.2.6 Sie erläutern, reflektieren und beraten zu körperlicher Aktivität, Bewegung und Sport. |
| 19.2.11 Sie kennen, erläutern und vermitteln zielgruppenspezifische Maßnahmen der Gesundheitsförderung und Prävention für ältere Menschen.  **Anlässe für ärztliche Konsultationen/Erkrankungsbezogene Inhalte:**  20.76 Rehabilitation und Nachsorge |

| **Besonderheiten in der Pflege alter Menschen** |
| --- |
| - das Prinzip der **aktivierenden Pflege** erläutern können |
| - die wichtigsten **Risikofaktoren für Stürze** aufzählen können |
| - die wichtigsten Interventionsmöglichkeiten zur **Sturzprophylaxe** aufzählen und erläutern können |
| - Bereiche nennen können, in denen geriatrische Patienten häufig erhöhten Pflegebedarf aufweisen |
| - mögliche Schwierigkeiten bei zunehmendem Pflegebedarf alter Menschen erläutern können |
| **ID** |
| 5.4 Die Absolventin und der Absolvent setzen vorbeugende, therapeutische und rehabilitative Maßnahmen effektiv ein. |
| 8.2 Die Absolventin und der Absolvent reflektieren die Zusammenarbeit im multiprofessionellen Team und gestalten diese in konstruktiver Weise im Hinblick auf eine hohe Qualität in der Patientenversorgung. |
| 8.2.2 Sie verfügen über eine berufsspezifische Rollenidentität und kennen die Rollen, Kompetenzen und Verantwortungsbereiche der anderen beteiligten Berufsgruppen. |
| 9.1.1.4 Sie können individuelle Ressourcen zur Verbesserung der gesundheitlichen Gesamtsituation von Personen identifizieren. |
| 11.1.1.2 Sie können die verschiedenen Interessenlagen, unter denen ihr Handeln stattfindet, erläutern, reflektieren sowie Konflikte mit den Interessen von Patientinnen und Patienten identifizieren und bei ihren Entscheidungen berücksichtigen. |
| 11.1.1.5 Sie können ihr ärztliches Handeln an den individuellen Erfordernissen von Patientinnen und Patienten ausrichten. |
| 11.1.6 Sie kennen und berücksichtigen die Bedürfnisse von Menschen mit Behinderung. |
| 11.4.3.1 Sie können soziale, kulturelle, ethnische, religiöse, alters-, geschlechter- und behinderungsbezogene Aspekte der Patientinnen und Patienten berücksichtigen. |
| 12.7.2 Entwicklung normaler Funktionen über die Lebensspanne: Sie erläutern die Veränderungen des normalen Körperaufbaus, der Organfunktionen, der Persönlichkeitsentwicklung und des Verhaltens über verschiedene Phasen der Lebensspanne. |
| 16.10.1.5 Sie können Prinzipien der Mobilisation adaptiert an die zugrunde liegende Störung erklären und anwenden.  19.2.6 Sie erläutern, reflektieren und beraten zu körperlicher Aktivität, Bewegung und Sport. |
| 19.2.11 Sie kennen, erläutern und vermitteln zielgruppenspezifische Maßnahmen der Gesundheitsförderung und Prävention für ältere Menschen. |
| 19.2.11.1 Sie können die Prävention wesentlicher Risiken im Seniorenalter benennen. |
| 19.2.11.2 Sie können Präventionsmaßnahmen gegen Immobilität, Osteoporose, kognitive Abbauprozesse und Harn-/Stuhlinkontinenz benennen und ein diesbezügliches Aufklärungsgespräch führen. |
| 19.2.11.5 Sie können die Bedeutung von Mobilität, Kognition, Inkontinenz, Ernährung bei älteren Menschen erkennen und sie unter dem Aspekt von Erhalt der Selbständigkeit, sozialen Bezügen und Lebensqualität reflektieren. |

| **Instant Aging** |
| --- |
| - sich gegenüber geriatrischen Patienten empathisch verhalten und mit ihnen dementsprechend kommunizieren können |
| - mit chronisch Kranken und betagten Patienten achtungsvoll umgehen können |
| **ID** |
| 5.1.1.3 Sie können ethische, soziale, kulturelle, psychische, behinderungssensible, alters- und geschlechterbezogene Belange identifizieren und bei der Patientenversorgung und medizinischen Entscheidungsfindung adäquat berücksichtigen. |
| 5.1.1.4 Sie können ihr Menschenbild kritisch reflektieren und anhand medizinischen, historischen und kulturellen Wissens weiterentwickeln. |
| 5.1.1.6 Sie können empathisch und patienten-zentriert handeln. |
| 5.2 Die Absolventin und der Absolvent wenden ihre Kenntnisse, ihre Fertigkeiten und ihr professionelles Verhalten (Haltungen) an und halten diese auf aktuellem Stand. |
| 11.1.1.2 Sie können die verschiedenen Interessenlagen, unter denen ihr Handeln stattfindet, erläutern, reflektieren sowie Konflikte mit den Interessen von Patientinnen und Patienten identifizieren und bei ihren Entscheidungen berücksichtigen. |
| 11.1.1.5 Sie können ihr ärztliches Handeln an den individuellen Erfordernissen von Patientinnen und Patienten ausrichten. |
| 11.1.6 Sie kennen und berücksichtigen die Bedürfnisse von Menschen mit Behinderung. |
| 11.4.3.3 Sie können zur Perspektivenübernahme in der Lage sein und verschiedene Perspektiven bei ihrem Handeln berücksichtigen. |
| 11.4.3.6 Sie können ihr ärztliches Handeln auf besonders vulnerable Personengruppen ausrichten.  **Anlässe für ärztliche Konsultationen/Erkrankungsbezogene Inhalte:**  20.25 Doppelbilder und Sehstörungen  20.33 Gehstörungen und Sturzneigung  20.48 Hörstörungen  20.60 Lähmungen  20.63 Müdigkeit / Erschöpfung / Allgemeine Schwäche  20.64 Multimorbidität  20.66 Muskelschwäche  20.74 Pflegebedürftigkeit, Gebrechlichkeit und Bettlägerigkeit  20.100 Steifheit und erschwerte Bewegungen (inkl. Rigor, Spastik)  20.106 Taubheitsgefühl und Kribbeln / Sensibilitätsstörungen  21.1.2.31 Arthrose  21.1.3.6 Diabeteskomplikationen (Mikro- und Makroangiopathien, Nephropathie, KHK, pAVK, Apoplex, diabetisches Fußsyndrom, diabetische Polyneuropathie, diabetische Retino- und Makulopathie) |
